# Supplementary material for: Variation in health service use by veterans with an accepted disability of post-traumatic stress disorder who had a service record post 1975: a cluster analysis
Source: HighWire-hosted journal article supplement (doi:10.1136/bmjmilitary-2020-001456), 2021-02-05
Supplement: bmjmilitary-2020-001456supp001_data_supplement.pdf [file bmjmilitary-2020-001456supp001_data_supplement.pdf]

Supplementary figures

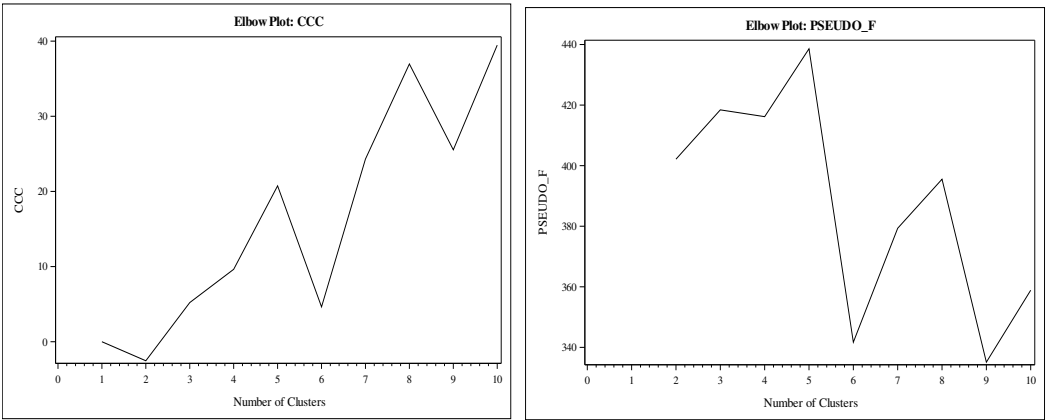

Figure S1: Results of the Cubic Clustering Criterion (CCC) and the pseudo F statistic, indicating 5 clusters are optimal

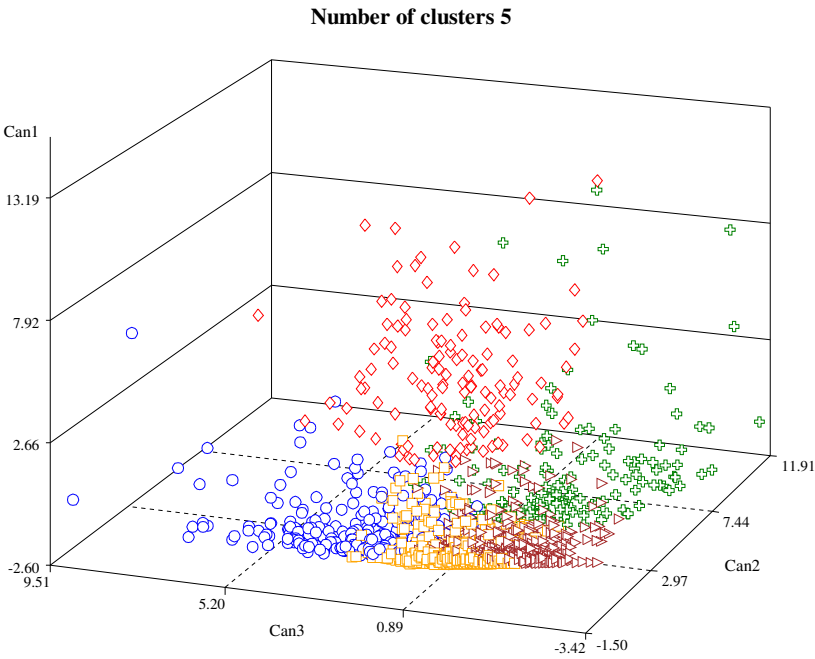

Figure S2: overlap of the clusters
